# Supplementary material
Source: MDPI journal article supplement (https://www.mdpi.com/2073-4344/9/7/584)
Supplement: s1 [file s1]

# Assessment of photocatalytic production of hydrogen from biomass or wastewaters depending on the metal co-catalyst and its deposition method on TiO<sub>2</sub>

Mikel Imizcoz, Alberto V. Puga\*<sup>‡</sup>

Instituto de Tecnología Química, Universitat Politècnica de València-Consejo Superior de Investigaciones Científicas, Avenida de los Naranjos, s/n, 46022 Valencia, Spain.

<sup>‡</sup> Current address: Departament d'Enginyeria Química, Universitat Rovira i Virgili, Av. dels Països Catalans, 26, 43007 Tarragona, Spain

alberto.puga@urv.cat

## Supporting Information

**Table S1.** Product yields for the photocatalytic reforming of glucose under simulated solar light on *M*/TiO<sub>2</sub>.<sup>[a,b]</sup>

| Photocatalyst                         | Production rate/ $\mu\text{mol g}_{\text{cat}}^{-1} \text{h}^{-1}$ |                 | TOF <sup>[c]</sup> / $\text{s}^{-1}$ |
|---------------------------------------|--------------------------------------------------------------------|-----------------|--------------------------------------|
|                                       | H <sub>2</sub>                                                     | CO <sub>2</sub> | H <sub>2</sub>                       |
| H <sub>2</sub> DP Au/TiO <sub>2</sub> | 993.8                                                              | 73.8            | 1171                                 |
| H <sub>2</sub> DP Ag/TiO <sub>2</sub> | 320.2                                                              | 17.0            | 298                                  |
| H <sub>2</sub> DP Cu/TiO <sub>2</sub> | 560.4                                                              | 59.0            | 44                                   |
| H <sub>2</sub> DP Pt/TiO <sub>2</sub> | 1706.9                                                             | 250.3           | 306                                  |
| P <sup>D</sup> Au/TiO <sub>2</sub>    | 905.6                                                              | 83.8            | 2169                                 |
| P <sup>D</sup> Ag/TiO <sub>2</sub>    | 402.4                                                              | 30.7            | 796                                  |
| P <sup>D</sup> Cu/TiO <sub>2</sub>    | 904.3                                                              | 56.3            | 134                                  |
| P <sup>D</sup> Pt/TiO <sub>2</sub>    | 1912.7                                                             | 158.2           | 1353                                 |
| I <sup>M</sup> Au/TiO <sub>2</sub>    | 298.3                                                              | 10.3            | 5993                                 |
| I <sup>M</sup> Ag/TiO <sub>2</sub>    | 203.8                                                              | 13.2            | 1099                                 |
| I <sup>M</sup> Cu/TiO <sub>2</sub>    | 259.3                                                              | 23.0            | 27                                   |
| I <sup>M</sup> Pt/TiO <sub>2</sub>    | 157.1                                                              | 29.6            | 52                                   |

<sup>[a]</sup> Stirred suspensions of the photocatalyst (25 mg) in aqueous glucose (5% w/v, 25 mL) were irradiated under simulated solar light (AM1.5G, 1.0 kW m<sup>-2</sup>) under Ar atmosphere (1.4 bar) at 25 °C for 2 h.

<sup>[b]</sup> Estimated standard deviations for H<sub>2</sub> production rates lie within a  $\pm 5\%$  error bar, as determined by independent results. <sup>[c]</sup> The activities per active site (TOF) were calculated according to the average co-catalyst particle size as listed in Table 1, assuming semi-spherical morphology and {111} facet surface atom densities.

**Table S2.** Hydrolysis of  $\alpha$ -cellulose in acidic aqueous media in short thermal cycles at different temperatures.<sup>[a]</sup>

| T/°C | cycle   | yield/% <sup>[b]</sup> |        |     |          | global saccharide<br>yield/% <sup>[c]</sup> | conversion/% <sup>[d]</sup> | molar<br>balance/% <sup>[d]</sup> |
|------|---------|------------------------|--------|-----|----------|---------------------------------------------|-----------------------------|-----------------------------------|
|      |         | glucose                | xylose | HMF | furfural |                                             |                             |                                   |
| 160  | #1      | 7.6                    | 67.4   | -   | -        | 18.3                                        | 21.5                        | 96.8                              |
|      | #2      | 4.8                    | 18.4   | -   | -        | 7.2                                         | 30.6                        | 94.9                              |
|      | #3      | 3.7                    | 7.8    | -   | -        | 4.5                                         | 35.0                        | 95.0                              |
|      | overall | 16.2                   | 93.6   | -   | -        | 29.9                                        | 35.0                        | 95.0                              |
| 180  | #1      | 9.1                    | 22.2   | 4.3 | 23.9     | 11.5                                        | 41.3                        | 77.9                              |
|      | #2      | 4.9                    | 10.0   | 2.6 | 2.1      | 6.5                                         | 59.2                        | 69.0                              |
|      | #3      | 3.0                    | 7.0    | 2.0 | 0.5      | 4.2                                         | 70.3                        | 63.8                              |
|      | overall | 17.1                   | 39.2   | 8.9 | 26.6     | 22.1                                        | 70.3                        | 63.8                              |

*concentrations of biomass-derived oxygenated substances in the hydrolysate used for photocatalytic H<sub>2</sub> production experiments*

|     |    | c/%(w/v) |        |     |          |
|-----|----|----------|--------|-----|----------|
|     |    | glucose  | xylose | HMF | furfural |
| 160 | #1 | 0.53     | 0.85   | -   | -        |
|     |    | c/%(mM)  |        |     |          |
|     |    | glucose  | xylose | HMF | furfural |
| 160 | #1 | 29.5     | 56.5   | -   | -        |

<sup>[a]</sup> Reaction conditions:  $\alpha$ -cellulose (6.00 g) in aqueous HCl (1% w/v, 60 mL), N<sub>2</sub> atmosphere, heated to the specified temperature (ramp  $\approx 10$  °C min<sup>-1</sup>) and then, allowed to cool down naturally to room temperature.

<sup>[b]</sup> Yields relative to the expected amounts of either glucose or xylose ( $\approx 85:15$  w/w) units in the starting  $\alpha$ -cellulose, as determined by HPLC using an Aminex® HPX-87H column. <sup>[c]</sup> Global yields relative to the total amount of saccharide units in the starting  $\alpha$ -cellulose. <sup>[d]</sup> Conversions and molar balances are cumulative.

**Table S3.** Product yields for the photocatalytic reforming of the  $\alpha$ -cellulose hydrolysate obtained after a first hydrolysis cycle at 160 °C<sup>[a]</sup> under simulated solar light<sup>[b]</sup> either directly or after UV pre-treatment<sup>[c]</sup> on M/TiO<sub>2</sub>

| Photocatalyst                                                   | Production rate/ $\mu\text{mol g}_{\text{cat}}^{-1} \text{h}^{-1}$ |                 |
|-----------------------------------------------------------------|--------------------------------------------------------------------|-----------------|
|                                                                 | H <sub>2</sub>                                                     | CO <sub>2</sub> |
| <i>simulated sunlight irradiation on raw hydrolysate</i>        |                                                                    |                 |
| <sup>H,DP</sup> Au/TiO <sub>2</sub>                             | < 0.1                                                              | 64.1            |
| <sup>PD</sup> Pt/TiO <sub>2</sub>                               | 0.2                                                                | 75.8            |
| <sup>H,DP</sup> Cu/TiO <sub>2</sub>                             | 0.1                                                                | 129.3           |
| <i>UV pre-treatment on raw hydrolysate</i>                      |                                                                    |                 |
| <sup>H,DP</sup> Cu/TiO <sub>2</sub>                             | 17.3                                                               | 125.8           |
| <i>simulated sunlight irradiation on after UV pre-treatment</i> |                                                                    |                 |
| <sup>H,DP</sup> Cu/TiO <sub>2</sub>                             | 2.9                                                                | 93.4            |

<sup>[a]</sup> Hydrolysis conditions at 160 °C (cycle #1) as described in Table S2. <sup>[b]</sup> Stirred suspensions of the photocatalyst (25 mg) in  $\alpha$ -cellulose hydrolysate (25 mL) were irradiated under simulated solar light (AM1.5G, 1.0 kW m<sup>-2</sup>) under Ar atmosphere (1.4 bar) at 25 °C for 2 h. <sup>[c]</sup> Irradiated by a similar procedure as described in [b] for simulated sunlight, but using an Hg lamp (125 W,  $\approx 1.5 \text{ kW m}^{-2}$ ). <sup>[e]</sup> Determined by HPLC using an Aminex® HPX-87H column.

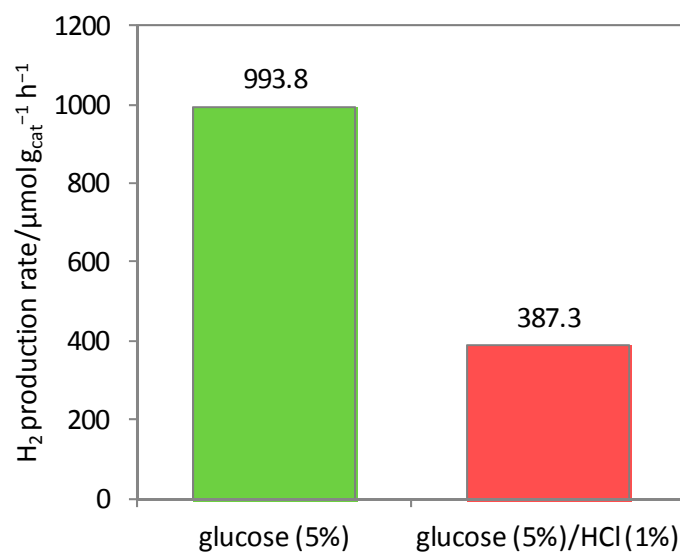

**Figure S1.** Photocatalytic H<sub>2</sub> yields from aqueous glucose at either natural pH or in an HCl-acidified medium on <sup>H,DP</sup>Au/TiO<sub>2</sub>. Stirred suspensions of the photocatalyst (25 mg) in aqueous glucose (5% w/v, 25 mL, without or with HCl, 1% w/v) irradiated under simulated solar light (AM1.5G, 1.0 kW m<sup>-2</sup>) under Ar atmosphere (1.4 bar) at 25 °C for 2 h.

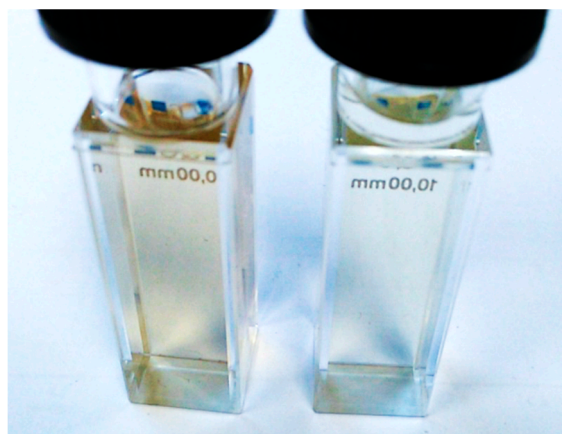

**Figure S2.** Picture showing the amber colour of the α-cellulose hydrolysate (left) obtained at 160 °C (cycle #1, see Table S2 footnote), and the bleaching effect caused by the UV photocatalytic treatment leading to an almost colourless solution (right).

**Table S4.** Chemical characteristics of the rice husks hydrolysate,<sup>[a]</sup> and wastewaters used in photocatalytic experiments.

| biomass hydrolysate or<br>wastewaters | <i>c</i> /(w/v) <sup>[b]</sup> |         |        |        |          | COD <sup>[c]</sup> /<br>mg L <sup>-1</sup> | [N] <sup>[d]</sup> /<br>mg L <sup>-1</sup> | $\sigma$ <sup>[e]</sup> /<br>$\mu\text{S cm}^{-1}$ |
|---------------------------------------|--------------------------------|---------|--------|--------|----------|--------------------------------------------|--------------------------------------------|----------------------------------------------------|
|                                       | sucrose                        | glucose | xylose | HMF    | furfural |                                            |                                            |                                                    |
| rice husks hydrolysate                | -                              | 0.27    | 0.88   | < 0.01 | 0.02     | $\approx 10^3$ <sup>[f]</sup>              | -                                          | -                                                  |
| municipal wastewater                  | -                              | < 0.01  | -      | -      | -        | 389                                        | 25                                         | 2130                                               |
| juice production wastewater           | 0.02                           | 0.04    | 0.03   | -      | -        | $\approx 10^2$ <sup>[f]</sup>              | -                                          | 2850                                               |

<sup>[a]</sup> Reaction conditions: milled rice husks (6.00 g) in an aqueous solution of concentrated HCl (1% w/v, 60 mL), N<sub>2</sub> atmosphere, heated to the specified temperature (ramp  $\approx 10$  °C min<sup>-1</sup>) and then, allowed to cool down naturally to room temperature. <sup>[b]</sup> Determined by HPLC using an Aminex® HPX-87H column. <sup>[c]</sup> COD: Chemical Oxygen Demand. <sup>[d]</sup> The major N species was [NH<sub>4</sub>]<sup>+</sup>. <sup>[e]</sup> Conductivity ( $\sigma$ ) measured using a Crison CM 35 device and a Crison + Pt 1000 Conductivity Cell. <sup>[f]</sup> Estimated from HPLC data.

**Table S5.** Product yields for the photocatalytic reforming of wastewaters under simulated solar light<sup>[a]</sup> on M/TiO<sub>2</sub>

| Photocatalyst                      | Production rate/ $\mu\text{mol g}_{\text{cat}}^{-1} \text{h}^{-1}$ |                 |
|------------------------------------|--------------------------------------------------------------------|-----------------|
|                                    | H <sub>2</sub>                                                     | CO <sub>2</sub> |
| <i>municipal wastewater</i>        |                                                                    |                 |
| H,DP Au/TiO <sub>2</sub>           | < 0.1                                                              | 15.8            |
| H,DP Cu/TiO <sub>2</sub>           | 0.1                                                                | 18.2            |
| <i>juice production wastewater</i> |                                                                    |                 |
| H,DP Au/TiO <sub>2</sub>           | 115.1                                                              | 306.9           |
| H,DP Cu/TiO <sub>2</sub>           | 10.7                                                               | 291.2           |

<sup>[a]</sup> Stirred suspensions of the photocatalyst (25 mg) in the corresponding wastewater (25 mL) were irradiated under simulated solar light (AM1.5G, 1.0 kW m<sup>-2</sup>) under Ar atmosphere (1.4 bar) at 25 °C for 2 h.
